# Supplementary material for: Transcriptomic Profiling of Meat Quality Traits of Skeletal Muscles of the Chinese Indigenous Huai Pig and Duroc Pig
Source: MDPI journal article supplement (doi:10.3390/genes14081548), 2023-07-28
Supplement: s1 [file s1]

Table S1. Primers used in qPCR for twenty-one genes.

| Genes                    | Sequence (5'-to-3')                               |
|--------------------------|---------------------------------------------------|
| <i>ANKRD1</i>            | F:GGACCGAGAAGGAGATACCC<br>R:ATGCGAGAGGCTTTGTAGGA  |
| <i>NR1D2</i>             | F:CACGCTTGTGAAGGCTGTAA<br>R:ATACGACCAAACCGAACAGC  |
| <i>MID1IP1</i>           | F:GGACATCCTGGTGGATCTG<br>R:CCTGCTTGTATCTGTTGGTGAG |
| <i>NPC2</i>              | F:TGGCAAATCCCAGTACAGATT<br>R:GCGTTCAGAGGCATGATACA |
| <i>PLA2G7</i>            | F:GACATGGATCGTGGGAAGTC<br>R:GCAATACCGCACCTGAATCT  |
| <i>BTG2</i>              | F:GAGCAGCGACTCAAGGTTTT<br>R:CGATGCGATAGGACACTTCA  |
| <i>RETSAT</i>            | F:ACAAGGCGATGGAGCACTAC<br>R:TTCAACGAAGGAGCTTTTGAG |
| <i>FBP2</i>              | F:TGGAGGGATCTTCCTGTACC<br>R:CTCGCTGATGAATGGTCTCA  |
| <i>MYH2</i>              | F:TCACCAAAGGCCAGACAGTA<br>R:TCCAAGACCCCGATGAAGTA  |
| <i>CSRP3</i>             | F:GTGCCATCTGTGGGAAGAGT<br>R:TGCTTTAGGCCAATGAGAGA  |
| <i>PITX2</i>             | F:TGGAGGCCACTTTCCAGAG<br>R:GTCGTCGTAGGGCTGCATAA   |
| <i>TPM1</i>              | F:CGACTGGCAACAGCTTTACA<br>R:TACGGGCCACCTCTTCATAC  |
| <i>TNNI1</i>             | F:CATGCCGGAAGTTGAGAGA<br>R:TCCACCTTGGCGTGAAGT     |
| <i>MYOG</i>              | F:GCTTTGAGCCACCAGGCTAC<br>R:CACAGACACGGACTTCCTCTT |
| <i>MYL3</i>              | F:TGATGCCTCCAAGATCAAGA<br>R:GGCAGGAACGTGTCAAAGTC  |
| <i>LMCD1</i>             | F:CTCCGGCTGTGACGAGATA<br>R:CAGGATGGCCTTAGCACACT   |
| <i>TMSB10</i>            | F:TTCGATAAGGCCAAGCTGAA<br>R:CTTCCTCCACATCCCGATTA  |
| <i>FHL1</i>              | F:CCGAGTGCTTTGTGTGTGTT<br>R:GCCTTTACCAAACCCAGTGA  |
| <i>TNNT1</i>             | F:GACAGGGCGTGAGATGAAAC<br>R:CGCCATCAGGTCAAACCTTCT |
| <i>LDHA</i>              | F:AACACTGGAAAGCGGTTTAC<br>R:CCCAAGATGCAAGGAACACT  |
| <i>ALDH2</i>             | F:GCTGACCGTGGCTACTTCAT<br>R:CAGCCCGTACTTGGAATTGT  |
| <i>GAPDH<sup>a</sup></i> | F:TCACCAGGGCTGCTTTTAAC<br>R:ATGGCCTTCCATTGATGAC   |

<sup>a</sup> GAPDH is the internal control gene.
